# Supplementary material for: Thirty-Three Long-Term Survivors After Cytoreductive Surgery in Patients With Peritoneal Metastases From Colorectal Cancer: A Retrospective Descriptive Study
Source: Research Square preprint supplement (doi:10.21203/rs.3.rs-104732/v1), 2020-11-18
Supplement: Supplementary file 1 [file 74fa5aff84ae03e2de4b0e17.xlsx]

## Sheet: Sheet1
TABLE 2 Postoperative course after CRS
Case	Recurrence	RFS (year)	The sites of	Reoperation	PCI	CCR	Second	OS (year)	Status	Prognosis
number	after CRS		recurrence	for recurrence	at reoperation	at reoperation	recurrence		(Dead or alive)	(Cured or non-cured)
1	Yes	0.794521	Abdominal wall	Yes	0	0	Yes	5.12603	Alive	Non-cured
2	Yes	2.91507	Peritoneum	Yes	7	0	Yes	5.1589	Dead	Non-cured
3	Yes	3.16712	Abdominal wall	No	—	—	—	5.25753	Alive	Non-cured
4	Yes	2	Abdominal wall	Yes	0	0	Yes	5.5	Alive	Non-cured
5	Yes	2.07397	Peritoneum	No	—	—	—	5.86301	Alive	Non-cured
6	Yes	2.23014	Abdominal wall	Yes	2	0	Yes	5.96164	Alive	Non-cured
7	Yes	0.7	Liver	Yes	0	0	Yes	6.02192	Dead	Non-cured
8	Yes	4.23836	Peritoneum	Yes	2	1	Yes	6.15068	Dead	Non-cured
9	Yes	2.68767	Lung	Yes	0	0	No	6.29863	Alive	Non-cured
10	Yes	4.57808	Lymph node	No	—	—	—	6.80274	Dead	Non-cured
11	Yes	2.59178	Lymph node	Yes	5	0	Yes	7.56712	Alive	Non-cured
12	Yes	1.49589	Lymph node	No	—	—	—	7.68493	Dead	Non-cured
13	Yes	2.2137	Abdominal wall, bone, brain	Yes	3	0	Yes	7.90685	Dead	Non-cured
14	Yes	5.6	Peritoneum, kidney	Yes	3	0	Yes	8.45753	Dead	Non-cured
15	Yes	7.38904	Peritoneum	No	—	—	—	9.13973	Alive	Non-cured
16	Yes	2	Peritoneum	Yes	14	2	Yes	9.8137	Dead	Non-cured
17	Yes	2.71781	Abdominal wall, liver, peritoneum, lung	Yes	4	0	Yes	10.7096	Alive	Non-cured
18	No	5.1	—	—	—	—	—	5.28493	Alive	Cured
19	No	5.3	—	—	—	—	—	5.3	Alive	Cured
20	No	5.3	—	—	—	—	—	5.53699	Alive	Cured
21	No	5.8	—	—	—	—	—	6.02192	Dead**	Cured
22	No	6.6	—	—	—	—	—	6.79726	Alive	Cured
23	No	6.7	—	—	—	—	—	6.90137	Alive	Cured
24	No	6.7	—	—	—	—	—	6.94247	Alive	Cured
25	No	6.9	—	—	—	—	—	7.13425	Alive	Cured
26	No	7.6	—	—	—	—	—	7.79726	Alive	Cured
27	No	8.6	—	—	—	—	—	8.84384	Alive	Cured
28	No	9.4	—	—	—	—	—	9.62466	Alive	Cured
29	No	9.7	—	—	—	—	—	9.87123	Alive	Cured
30	Yes	4.60274	Peritoneum	Yes	8	0	No*	10.2164	Alive	Cured
31	No	11.9	—	—	—	—	—	12.1288	Alive	Cured
32	No	12.1	—	—	—	—	—	12.2548	Alive	Cured
33	Yes	1.63288	Liver, lung	Yes	0	0	No*	28.8274	Alive	Cured
Abbreviations. CCR, completeness of cytoreduction; CRS, cytoreductive surgery; OS, verall survival; PCI, peritoneal cancer index; recurrence-free survival.
* The re-recurrence-free intervals were at least 5 years after the 2nd surgery.
** Non-cancer-related death.
